# Supplementary material for: Volatile emissions of scented Alstroemeria genotypes are dominated by terpenes, and a myrcene synthase gene is highly expressed in scented Alstroemeria flowers
Source: PubMed Central journal article supplement — J Exp Bot. 2012 Jan 20;63(7):2739–52. doi: 10.1093/jxb/err456 (PMC3346232; doi:10.1093/jxb/err456), 2012-01-20
Supplement: supp_err456_00070961-file001.pdf [file supp_err456_00070961-file001.pdf]

**Volatile emissions of scented *Alstroemeria* genotypes are dominated by terpenes, and a myrcene synthase gene is highly expressed in scented *Alstroemeria* flowers.**

Danilo Aros, Veronica Gonzalez, Rudolf K. Allemann, Carsten T. Müller, Carlo Rosati, and Hilary J. Rogers

**Supplementary Table 1.** Terpenoid synthases genes used for comparisons with *Alstro*TPS.

| Gene bank | Terpene Synthase                     | aa  | Type            | Species                                 | References                  |
|-----------|--------------------------------------|-----|-----------------|-----------------------------------------|-----------------------------|
| AAC24192  | (E)- $\alpha$ -bisabolene synthase   | 817 | C <sub>15</sub> | <i>Abies grandis</i>                    | Bohlmann et al., 1998       |
| AAB70707  | (-)-camphene synthase                | 618 | C <sub>10</sub> | <i>Abies grandis</i>                    | Bohlmann et al., 1997       |
| AAB71084  | myrcene synthase                     | 627 | C <sub>10</sub> | <i>Abies grandis</i>                    | Bohlmann et al., 1997       |
| AAB71085  | pinene synthase                      | 628 | C <sub>10</sub> | <i>Abies grandis</i>                    | Bohlmann et al., 1997       |
| O64404    | $\delta$ -selinene synthase          | 581 | C <sub>15</sub> | <i>Abies grandis</i>                    | Steele et al., 1998         |
| N/I       | <i>Alstroemeria</i> TPS              | 567 | N/I             | <i>Alstroemeria</i> sp                  | N/I                         |
| AAO42614  | (E)- $\beta$ -ocimene synthase       | 579 | C <sub>10</sub> | <i>Antirrhinum majus</i>                | Dudareva et al., 2003       |
| AAO41727  | myrcene synthase                     | 584 | C <sub>10</sub> | <i>Antirrhinum majus</i>                | Dudareva et al., 2003       |
| Q38802    | copalyl diphosphate/kaurene          | 802 | C <sub>20</sub> | <i>Arabidopsis thaliana</i>             | Sun and Kamiya, 1994        |
| NP_567511 | (E)- $\beta$ -ocimene synthase       | 565 | C <sub>10</sub> | <i>Arabidopsis thaliana</i>             | Bohlmann et al., 2000       |
| NP_179998 | myrcene/ocimene synthase             | 591 | C <sub>10</sub> | <i>Arabidopsis thaliana</i>             | Bohlmann et al., 2000       |
| AAL79181  | $\beta$ -caryophyllene synthase      | 548 | C <sub>15</sub> | <i>Artemisia annua</i>                  | Cai et al., 2002            |
| AAK58723  | (-)- $\beta$ -pinene synthase        | 582 | C <sub>10</sub> | <i>Artemisia annua</i>                  | Lu et al., 2002             |
| CAC08805  | epi-cedrol synthase                  | 547 | C <sub>15</sub> | <i>Artemisia annua</i>                  | Mercke et al., 1999         |
| ABI21838  | (+)- $\alpha$ -pinene synthase       | 615 | C <sub>10</sub> | <i>Cannabis sativa</i>                  | Guennewich et al., 2007     |
| AAQ04608  | valencene synthase                   | 548 | C <sub>15</sub> | <i>Citrus sinensis</i>                  | Sharon-Asa et al., 2003     |
| BAD27260  | $\beta$ -pinene synthase             | 602 | C <sub>10</sub> | <i>Citrus unshiu</i>                    | Shimada et al., 2005        |
| Q96376    | S-linalool synthase                  | 870 | C <sub>10</sub> | <i>Clarkia breweri</i>                  | Dudareva et al., 1996       |
| AAU05951  | (E,E)- $\alpha$ -farnesene synthase  | 561 | C <sub>15</sub> | <i>Cucumis sativus</i>                  | Mercke et al., 2004         |
| CAA75244  | copalyl diphosphate synthase         | 959 | C <sub>20</sub> | <i>Gibberella fujikuroi</i>             | Tudzynski et al., 1996      |
| AAF74977  | (+)- $\delta$ -cadinene synthase     | 551 | C <sub>15</sub> | <i>Gossypium hirsutum</i>               | Townsend et al., 2005       |
| AAA86337  | vetispiradiene synthase              | 555 | C <sub>15</sub> | <i>Hyoscyamus muticus</i>               | Back et al., 1995           |
| AAM11626  | germacrene A synthase LTC1           | 559 | C <sub>15</sub> | <i>Lactuca sativa</i>                   | Bennett et al., 2002        |
| ABB73045  | linalool synthase                    | 564 | C <sub>10</sub> | <i>Lavandula angustifolia</i>           | Landmann et al., 2007       |
| AAT86042  | (E)- $\beta$ -ocimene synthase       | 595 | C <sub>10</sub> | <i>Lotus corniculatus</i>               | Arimura et al., 2004        |
| ACC66282  | $\alpha$ -terpineol synthase         | 592 | C <sub>10</sub> | <i>Magnolia grandiflora</i>             | Lee and Chappell, 2008      |
| ACC66281  | $\beta$ -cubebene synthase           | 550 | C <sub>15</sub> | <i>Magnolia grandiflora</i>             | Lee and Chappell, 2008      |
| AAL99381  | linalool synthase                    | 606 | C <sub>10</sub> | <i>Mentha aquatica</i>                  | Crowell et al., 2002        |
| CAH10288  | cis-muroladiene synthase             | 551 | C <sub>15</sub> | <i>Mentha x piperita</i>                | Prosser et al., 2006        |
| Q40577    | 5-epi-aristolochene synthase         | 548 | C <sub>15</sub> | <i>Nicotiana tabacum</i>                | Facchini and Chappell, 1992 |
| AAK06663  | limonene synthase                    | 604 | C <sub>10</sub> | <i>Perilla frutescens</i>               | Takeya et al., 2000 *       |
| AAS47689  | (E)- $\alpha$ -bisabolene synthase   | 807 | C <sub>15</sub> | <i>Picea abies</i>                      | Martin et al., 2004         |
| AAS47693  | (-)-linalool synthase                | 623 | C <sub>10</sub> | <i>Picea abies</i>                      | Martin et al., 2004         |
| AAS47695  | longifolene synthase                 | 578 | C <sub>15</sub> | <i>Picea abies</i>                      | Martin et al., 2004         |
| AAS47696  | myrcene synthase                     | 633 | C <sub>10</sub> | <i>Picea abies</i>                      | Martin et al., 2004         |
| CAC35696  | isoprene synthase                    | 595 | C <sub>5</sub>  | <i>Populus alba</i> x <i>P. tremula</i> | Miller et al., 2001         |
| CAC41012  | myrcene synthase                     | 597 | C <sub>10</sub> | <i>Quercus ilex</i>                     | Fischbach et al., 2001      |
| CAK55186  | pinene synthase                      | 597 | C <sub>10</sub> | <i>Quercus ilex</i>                     | Schnitzler, 2006*           |
| AAC26018  | (+)-sabinene synthase                | 590 | C <sub>10</sub> | <i>Salvia officinalis</i>               | Wise et al., 1998           |
| BAA84918  | copalyl diphosphate synthase         | 800 | C <sub>20</sub> | <i>Solanum lycopersicum</i>             | Imai, 1998 *                |
| CAE47440  | germacrene D synthase                | 551 | C <sub>15</sub> | <i>Solidago canadensis</i>              | Prosser et al., 2004        |
| AAD34295  | kaurene synthase                     | 784 | C <sub>20</sub> | <i>Stevia rebaudiana</i>                | Richman et al., 1999        |
| AAS66358  | (+)-valencene synthase               | 556 | C <sub>15</sub> | <i>Vitis vinifera</i>                   | Lucker et al., 2004         |
| AAS66357  | (-)-germacrene D synthase            | 557 | C <sub>15</sub> | <i>Vitis vinifera</i>                   | Lucker et al., 2004         |
| ABY79206  | (E)- $\beta$ -caryophyllene synthase | 547 | C <sub>15</sub> | <i>Zea mays</i>                         | Kollner et al., 2008        |
| BAG12020  | $\alpha$ -humulene synthase          | 548 | C <sub>15</sub> | <i>Zingiber zerumbet</i>                | Yu et al., 2008             |

\* indicates a direct submission into Genbank with no accompanying reference, (N/I: no information).

**Supplementary Table 2.** Primers used for the amplification of gDNA comprising the *AlstroTPS* gene sequence showing their sequence (5' - 3'), length (bp) and T<sub>m</sub> (°C).

| Primer    | Sequence (5' - 3')        | Length (bp) | T <sub>m</sub> (°C) |
|-----------|---------------------------|-------------|---------------------|
| INTRON1 F | CGCCGCTCGGCAAATTATA       | 19          | 55.8                |
| INTRON1 R | TAGCAATATAGGTTCCACCAACA   | 23          | 53.7                |
| INTRON2 F | CCTGGAGATGCAGACAAGTATT    | 22          | 54.5                |
| INTRON2 R | GCGTTCTACAGATTCTACAGATACA | 25          | 54.0                |
| INTRON3 F | CCCGTGACATTAAGGGATTATTG   | 23          | 53.6                |
| INTRON3 R | GCTCTAAAGCATGTAAGGCTC     | 21          | 53.5                |
| INTRON4 R | CCTCCTCAAAGTGATACGCC      | 20          | 55.3                |
| INTRON5 F | GGCGTATACAAGACAGAAATCAG   | 23          | 53.4                |
| NCF421 F  | CAGGCTCGAGAAGCTGAA        | 18          | 54.5                |
| NCF421 R  | ACGTCGTAGATGTCATCGAT      | 20          | 53.1                |
| ALSTER F  | GGGGACATCTATTACTCACT      | 21          | 53.2                |
| ALSTER R  | GTTTCATGCATGTAGCATTG      | 20          | 50.1                |

**Supplementary Table 3.** Comparison of the size and position of the introns of *AlstroTPS* with other TPS genes (Full names and details are listed in Supplementary Table 1 and Fig 7). Roman numerals correspond to intron numbers. Dashes and ND symbolize absence of intron and intron size Not Determined respectively. (1) Information provided by J. Chappell (personal communication); (2) Sequence obtained from a public database; (<http://www.ncbi.nlm.nih.gov/>); (3) Data adapted from Trapp and Croteau (2001).

| Terpene synthase                                                                                      | Intron size (bp) |     |     |     |     |     |     |      |     |     |      |     |      |     | TOTAL no of introns |
|-------------------------------------------------------------------------------------------------------|------------------|-----|-----|-----|-----|-----|-----|------|-----|-----|------|-----|------|-----|---------------------|
|                                                                                                       | I                | II  | III | IV  | V   | VI  | VII | VIII | IX  | X   | XI   | XII | XIII | XIV |                     |
| $\beta$ -cubebene synthase (ACC66281) <i>M. grandiflora</i> (sesquiterpene) <sup>1</sup>              | -                | -   | 687 | -   | -   | -   | -   | -    | -   | -   | -    | -   | -    | -   | 1                   |
| terpene cyclase pseudogene (EU366431) <i>M. grandiflora</i> (sesquiterpene) <sup>1</sup>              | -                | -   | 677 | -   | -   | -   | -   | 801  | -   | -   | 1134 | 266 | -    | -   | 4                   |
| <b>terpene synthase</b><br><b><i>Alstroemeria</i> sp. (monoterpene)</b>                               | -                | -   | 111 | -   | -   | -   | -   | 222  | -   | -   | 106  | -   | 110  | 73  | 5                   |
| myrcene/ocimene synthase (NP_179998) <i>A. thaliana</i> (monoterpene) <sup>2</sup>                    | -                | -   | 100 | -   | -   | -   | -   | 151  | -   | -   | 387  | 145 | 279  | 234 | 6                   |
| $\alpha$ -terpineol synthase (ACC66282) <i>M. grandiflora</i> (monoterpene) <sup>1</sup>              | -                | -   | 76  | -   | -   | -   | -   | 97   | -   | -   | 158  | 84  | 114  | 480 | 6                   |
| limonene synthase (AAK06663) <i>P. frutescens</i> (monoterpene) <sup>3</sup>                          | -                | -   | 698 | -   | -   | -   | -   | 826  | -   | -   | 125  | 326 | 91   | 119 | 6                   |
| limonene cyclase (Z97341) <i>A. thaliana</i> (putative protein) <sup>3</sup>                          | -                | -   | 100 | -   | -   | -   | -   | 212  | -   | -   | 437  | 89  | 308  | 178 | 6                   |
| vetispiradiene synthase (AAA86337) <i>H. muticus</i> (Sesquiterpene) <sup>3</sup>                     | -                | -   | ND  | -   | -   | -   | -   | ND   | -   | -   | ND   | 93  | ND   | ND  | 6                   |
| 5- <i>epi</i> -aristolochene synthase(Q40577) <i>N. tabacum</i> (sesquiterpene) <sup>3</sup>          | -                | -   | 127 | -   | -   | -   | -   | 87   | -   | -   | 76   | 131 | 155  | 113 | 6                   |
| $\delta$ -Selinene synthase (O64404) <i>A. grandis</i> (sesquiterpene) <sup>3</sup>                   | -                | -   | 122 | -   | -   | -   | 84  | 147  | 101 | -   | 55   | 142 | 361  | 76  | 8                   |
| pinene synthase (AAB71085) <i>A. grandis</i> (monoterpene) <sup>3</sup>                               | -                | -   | 107 | -   | -   | -   | 85  | 146  | 92  | 537 | 99   | 94  | 106  | 120 | 9                   |
| ( <i>E</i> )- $\alpha$ -bisabolene synthase (AAC24192) <i>A. grandis</i> (sesquiterpene) <sup>3</sup> | -                | -   | 205 | 164 | 428 | 456 | 156 | 134  | 108 | 96  | 116  | 141 | 103  | -   | 11                  |
| copalyl diphosphate/kaurene synthase (Q38802) <i>A. thaliana</i> (diterpene) <sup>3</sup>             | 822              | 115 | 283 | 253 | 198 | 121 | 79  | 82   | 212 | 357 | 263  | 927 | 494  | 270 | 14                  |
